# Supplementary material
Source: Elsevier journal article supplement (http://www.ipae.uran.ru/sites/default/files/publications/Belskii_EA/mmc1.doc)
Supplement: mmc1 [file mmc1.doc]

**Appendix 1.**

Number of invertebrates in food samples of *F. hypoleuca* and *P. ater* collected in two zones near the Middle-Ural copper smelter in the year 2000.

| Taxon, developmental stage | *Ficedula hypoleuca* | | *Parus ater* | |
| --- | --- | --- | --- | --- |
| Zone | | | |
| background | impact | background | impact |
| Lepidoptera | 45 | 30 | 97 | 104 |
| imagoes | 4 | 3 | 1 | 2 |
| larvae | 41 | 27 | 96 | 102 |
| Diptera | 69 | 6 | 24 | 1 |
| imagoes | 69 | 6 | 23 | 1 |
| larvae | 0 | 0 | 1 | 0 |
| Hymenoptera | 16 | 7 | 0 | 2 |
| Symphyta imagoes | 6 | 1 | 0 | 1 |
| Symphyta larvae | 5 | 3 | 0 | 1 |
| Formicidae imagoes | 5 | 3 | 0 | 0 |
| Araneae | 33 | 24 | 99 | 57 |
| Coleoptera | 23 | 5 | 5 | 2 |
| imagoes | 21 | 5 | 3 | 0 |
| larvae | 2 | 0 | 2 | 2 |
| Homoptera | 32 | 1 | 13 | 5 |
| Aphidinea | 1 | 0 | 13 | 1 |
| Cicadinea | 31 | 1 | 0 | 4 |
| Hemiptera | 16 | 2 | 0 | 0 |
| Opiliones | 4 | 0 | 0 | 0 |
| Megaloptera | 3 | 1 | 0 | 0 |
| Mollusca | 3 | 0 | 0 | 1 |
| Raphidioptera | 1 | 0 | 0 | 0 |
| Trichoptera | 0 | 1 | 0 | 2 |
| Not determined | 2 | 1 | 0 | 0 |
| Sum total | 247 | 78 | 238 | 174 |

**Appendix 2.**

Dry-to-wet mass ratio and assimilable energy density of different invertebrate taxa from the bird diet.

| Taxon, developmental stage | Dry mass in % of wet mass ± SE (n) * | Assimilable energy density, kJ/g dry mass ** |
| --- | --- | --- |
| Lepidoptera, i *** | 36.0±1.9 (11) | 15.78 |
| Lepidoptera, l *** | 22.5±1.5 (19) | 17.21 |
| Diptera, i | 38.2±3.8 (6) | 15.78 |
| Hymenoptera: Symphyta, i | 37.1±1.2 (8) | 15.78 |
| Symphyta, l | 20.6±1.4 (4) | 17.21 |
| Formicidae, i | 37.0±4.3 (6) | 15.78 |
| Araneae | 33.1±1.3 (14) | 12.56 |
| Coleoptera, i | 38.6±1.1 (27) | 15.78 |
| Coleoptera, l | 23.0±2.7 (3) | 17.21 |
| Homoptera Cicadinea, i | 38.6±3.0 (5) | 15.78 |
| Homoptera Aphidinea, i | 27.9±0.6 (10) | 15.78 |
| Hemiptera, i | 46.5±1.8 (12) | 15.78 |
| Mollusca | 26.8±0.8 (22) | no data |

* own data.

** from: Dolnik and Postnikov, 1990.

*** i – imagoes, l – larvae;

**Appendix 3**

Contaminant exposure of nestlings before leaving the nest was calculated as daily metal intake per unit of body mass as follows.

*Ti = Ai * F / m ,*

where *Ti* – exposure to *i*-metal, *Ai* – average weighted dietary concentration of *i*-metal, *F* – daily food intake of one nestling (dry mass), *m* – nestling body mass.

Average weighted metal concentrations in food were calculated based on metal concentrations in different preys and proportions of different components in food dry mass) (Tables 1–3) using formula:

,

where – average weighted dietary concentration of *i*-metal, – concentration of *i*-metal in *j*-diet component, – mass of *j*-diet component in 1 g of dry food.

Daily food intake was calculated on the basis of daily energy of maintenance and energy content of food using formula:

,

where *F* – daily food intake, *DEM* – daily energy of maintenance,  *pj* – mass of *j*-diet component in 1 g of dry food, *Ej* – assimilable energy density of *j*-diet component (see Appendix 2) and is assimilable energy content of food.

Daily energy of maintenance for passerine fledglings reaching adult body mass is

*DEMf* = 6.12 * *mf* 0.688 kJ/day,

where *mf* is body mass (Dolnik and Dolnik, 1994).

Body mass (± SE) of the birds in the study area is 13.04±0.02 g (n=1840) for *F. hypoleuca* and 9.20±0.06 g (77) for *P. ater*. *DEMf* of nestlings *F. hypoleuca* is 35.81 kJ/day, *P. ater* 28.17 kJ/day.

Assimilable energy content of food in *F. hypoleuca* is 16.2 kJ/g dry mass in the background zone and 16.3 kJ/g in the impact one, and in *P. ater* 14.8 kJ/g and 16.1 kJ/g respectively.

**Appendix 4**

Contribution of different diet components to metal intake (on example of Cu) in *F. hypoleuca* in two zones near the Middle-Ural copper smelter.

| Taxon, developmental stage | Background zone | | | | Impact zone | | | |
| --- | --- | --- | --- | --- | --- | --- | --- | --- |
| mass in 1 g of food | Cu concentration, mkg/g | mass*concentration | contribution to metal intake, % | mass in 1g of food | Cu concentration, mkg/g | mass*concentration | contribution to metal intake, % |
| Lepidoptera, i * | 0.030 | 15.9 | 0.5 | 2.6 | 0.041 | 26.8 | 1.1 | 2.9 |
| Lepidoptera, l * | 0.348 | 7.5 | 2.6 | 14.0 | 0.665 | 14.8 | 9.8 | 26.7 |
| Diptera, i | 0.196 | 18.6 | 3.6 | 19.5 | 0.057 | 31.5 | 1.8 | 4.9 |
| Hymenoptera, Symphyta, i | 0.044 | 20.5 | 0.9 | 4.8 | 0.012 | 59.1 | 0.7 | 1.6 |
| Hymenoptera, Symphyta, l | 0.077 | 9.6 | 0.7 | 3.9 | 0.023 | 18.6 | 0.4 | 1.1 |
| Hymenoptera, Formicidae, i | 0.018 | 14.9 | 0.3 | 1.4 | 0.007 | 42.9 | 0.3 | 0.8 |
| Araneae | 0.074 | 73.4 | 5.4 | 29.0 | 0.151 | 139.6 | 21.1 | 57.1 |
| Coleoptera, i | 0.062 | 15.1 | 0.9 | 5.0 | 0.022 | 41.8 | 0.9 | 2.5 |
| Coleoptera, l | 0.003 | n.a. ** | n.a. | n.a. | 0.000 | n.a. | 0 | 0 |
| Homoptera, i | 0.061 | 28.9 | 1.8 | 9.4 | 0.003 | 109.4 | 0.3 | 0.9 |
| Hemiptera, i | 0.061 | 29.6 | 1.8 | 9.6 | 0.010 | 55.0 | 0.5 | 1.5 |
| Opiliones | 0.016 | n.a. | n.a. | n.a. | 0.000 | n.a. | 0 | 0 |
| Megaloptera, i | 0.006 | n.a. | n.a. | n.a. | 0.003 | n.a. | n.a. | n.a. |
| Mollusca | 0.003 | 45.1 | 0.1 | 0.7 | 0.000 | 233.1 | 0 | 0 |
| Raphidioptera, i | 0.001 | n.a. | n.a. | n.a. | 0.000 | n.a. | 0 | 0 |
| Trichoptera, i | 0.000 | n.a. | 0 | 0 | 0.007 | n.a. | 0 | 0 |
| Sum | 1.000 | – | 18.7 | 100 | 1.000 | – | 37.0 | 100 |

* i – imagoes, l – larvae; ** n.a. − not analysed
